# Supplementary material for: Multi-luminescent center integrated metal–organic frameworks for high-performance white light-emitting diodes
Source: Royal Society of Chemistry journal article supplement (doi:10.1039/d3tc03610c), 2023-12-06
Supplement: d3tc03610c1.pdf [file d3tc03610c1.pdf]

## Supporting Information

### Multi-luminescent centers integrated metal–organic frameworks for high-performance white light-emitting diode

Hailong Wu, Ying Tang, Yuanjing Cui\* and Guodong Qian\*

State Key Laboratory of Silicon and Advanced Semiconductor Materials, ZJU-Hangzhou  
Global Scientific and Technological Innovation Center, School of Materials Science and  
Engineering, Zhejiang University, Hangzhou 310030, China.

E-mail: cuiyj@zju.edu.cn; gdqian@zju.edu.cn

## **1. Experimental section**

### **1.1 Chemicals and materials**

Zinc nitrate hexahydrate ( $\text{Zn}(\text{NO}_3)_2 \cdot 6\text{H}_2\text{O}$ , 99%), lead chloride ( $\text{PbCl}_2$ , 99.999%), lead bromide ( $\text{PbBr}_2$ , 99.999%), lead iodide ( $\text{PbI}_2$ , 99.999%), oleic acid (OA, AR), oleyl amine (OAm, AR) and organic fluorescent dye SRh101 were purchased from Aladdin Ltd (Shanghai, China). 2-Methylimidazole (Hmim, 98%) and tetramethyl orthosilicate (TMOS, 98%) were purchased from Energy Chemical. Organic fluorescent dye pm567A was purchased from Exciton (Shanghai, China). Cesium chloride ( $\text{CsCl}$ , 99.9%), Cesium bromide ( $\text{CsBr}$ , 99.9%) and Cesium iodide ( $\text{CsI}$ , 99.9%) were purchased from Xi'an Polymer Light Technology Corp. All the reagents purchased were commercially available and used without further purification.

### **1.2 Synthesis of ZIF-8, ZIF-8 $\supset$ pm567A, ZIF-8 $\supset$ SRh101, ZIF-8 $\supset$ pm567A/SRh101**

The ZIF-8 $\supset$ dye nanoparticles were synthesized according to the previous report with minor modifications.<sup>1</sup> A stock solution of organic fluorescent dyes pm567A (0.005 M) and SRh101 (0.005M) in DMF was prepared. 0.2 g  $\text{Zn}(\text{NO}_3)_2 \cdot 6\text{H}_2\text{O}$  was dissolved in 8 ml methanol and an appropriate amount of organic dyes stock solution was added. Then 10 ml methanol solution containing 0.6g 2-Methylimidazole was dropwise added into the mixed solution above. ZIF-8 $\supset$ dye nanoparticles were generated after three hours of stirring with a rotary speed of 150 r/min, collected by centrifugation, washed with methanol 5 times and dried in air. Pure ZIF-8 was obtained without any addition of organic dye stock solution.

### **1.3 Synthesis of all-inorganic metal halide perovskite nanocrystals ( $\text{CsPbX}_3$ NCs)**

$\text{CsPbX}_3$  NCs were synthesized via room-temperature supersaturated recrystallization (SR) reported by Zeng et al with minor modification.<sup>2</sup> In a typical synthesis of  $\text{CsPbClBr}_2$  NCs,  $\text{PbBr}_2$  (0.2 mmol, 73.4 mg) and  $\text{CsCl}$  (0.2 mmol, 33.7 mg) were added in the solution containing 5 ml DMF, 0.5 ml OA and 0.25 ml OAm, followed by continuous ultrasound until complete dissolution. An appropriate amount of methanol was added to assist in the dissolution of  $\text{CsCl}$ . Then, 2 ml precursor solution was swiftly added to 10 ml toluene under vigorous stirring. A

pale green solution formed within a few seconds. Other perovskite nanocrystals with different halide compositions were fabricated with a mixture of  $\text{PbX}_2$  and  $\text{CsX}$  ( $X = \text{Cl}, \text{Br}, \text{I}$ ). The obtained  $\text{CsPbX}_3$  NCs were washed with toluene via precipitation and redispersed in toluene.

#### 1.4 Synthesis of $\text{ZIF-8} \supset \text{dye} @ \text{CsPbX}_3 @ \text{SiO}_2$

$\text{ZIF-8} \supset \text{dye} @ \text{CsPbX}_3 @ \text{SiO}_2$  nanocomposites were prepared by mixing the as-obtained ZIF-8 or ZIF-8  $\supset$  dye with  $\text{CsPbX}_3$  NCs and TMOS. In a typical synthesis of  $\text{ZIF-8} \supset \text{pm567A/SRH101} @ \text{CsPbClBr}_2 @ \text{SiO}_2$ , 30 mg ZIF-8  $\supset$  pm567A/SRH101 was evenly dispersed to 5 ml toluene with the assistance of ultrasound and then appropriate amount of  $\text{CsPbClBr}_2$  NCs and 100  $\mu\text{L}$  TMOS was added. After stirring for 12 h, the product was collected by centrifugation, washed with toluene and dried in air. For comparison, a series of  $\text{ZIF-8} @ \text{CsPbX}_3$  was also prepared.

#### 1.5 Determination of the loading amount of $\text{CsPbX}_3$ NCs in $\text{ZIF-8} \supset \text{dye} @ \text{CsPbX}_3 @ \text{SiO}_2$ .

After completing stirring to synthesize  $\text{ZIF-8} \supset \text{dye} @ \text{CsPbX}_3 @ \text{SiO}_2$ , almost all products rapidly settled down within a few minutes and there were few or no apparent  $\text{CsPbX}_3$  NCs on the supernatant. Based on the fact that the vast majority of  $\text{CsPbX}_3$  NCs anchored on the surface of ZIF-8  $\supset$  dye and subsequently settled with ZIF-8  $\supset$  dye particles, we can evaluate the loading amounts of  $\text{CsPbX}_3$  NCs by simply calculate the mass ratio of  $\text{CsPbX}_3$  NCs and ZIF-8  $\supset$  dye added to the stirring. A certain mass ( $m$ ) of  $\text{CsPbX}_3$  NCs was redispersed in toluene with a volume of  $V_1$  to obtain a stock solution. Based on the above analysis, the loading amount of  $\text{CsPbX}_3$  NCs of  $\text{ZIF-8} \supset \text{dye} @ \text{CsPbX}_3 @ \text{SiO}_2$  can be expressed to be  $\omega = (m \times V_2 / V_1) / (M + m \times V_2 / V_1)$ , where  $V_2$  and  $M$  represent the volume of the stock solution of  $\text{CsPbX}_3$  NCs and the mass of ZIF-8  $\supset$  dye, respectively. For  $\text{CsPbClBr}_2$  NCs, the  $m$ ,  $M$  and  $V_1$  were determined as 5.1 mg, 30 mg, and 20 mL, respectively. Therefore, the appropriate volume ( $V_2$ ) of this stock solution was added to obtain  $\text{ZIF-8} \supset \text{dye} @ \text{CsPbClBr}_2 @ \text{SiO}_2$  with a desirable loading amount of  $\text{CsPbClBr}_2$  NCs. For example, when 100  $\mu\text{L}$  stock solution of  $\text{CsPbClBr}_2$  NCs was added, the loading amount can be calculated to be 0.085 wt%.

## 1.6 Fabrication of LEDs

The prototype white LEDs were fabricated by coating intimate mixtures of ZIF-8@ $\text{dye}@CsPbX_3@SiO_2$  and transparent epoxy resin on a commercial blue-LED chip ( $\lambda_{\text{max}} = 460 \text{ nm}$ ). CRI, CIE and CCT were calculated by “Chameleon-Spectrum” software.

## 1.7 Measurements

Powder X-ray diffraction (PXRD) patterns were collected on an X'Pert PRO diffractometer with Cu  $K\alpha$  radiation ( $\lambda = 1.542 \text{ \AA}$ ) at room temperature, in the range of  $2\theta = 5\text{-}50^\circ$ . The morphology was investigated using field-emission scanning electron microscopy (FE-SEM, Hitachi S4800). Transmission electron microscope imaging and STEM-EDS were performed on the HRTEM (Tecnai G2 F20 S-TWIN, FEI) operating at an acceleration voltage of 100 kV. UV-vis absorption spectroscopy was measured with a UV-2600 UV-vis spectrophotometer (Shimadzu, Japan). The Steady-state fluorescence spectrum was obtained on a Hitachi F-4600 fluorescence spectrometer at room temperature. The quantum yields were recorded on an Edinburgh Instrument F920 spectrometer.

## 2. Supporting Tables and Figures

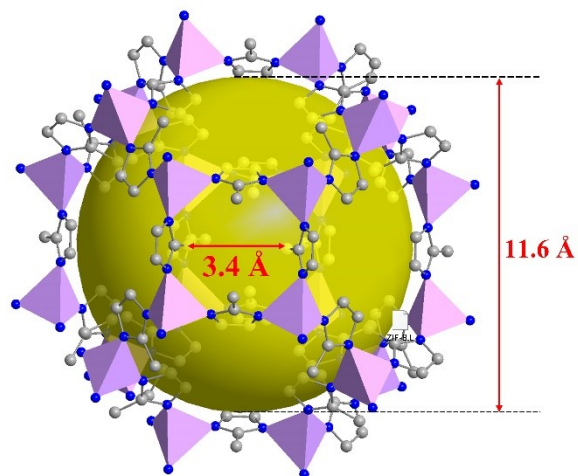

**Figure S1.** Single-crystal structure of ZIF-8, where the aperture and cage sizes are indicated.

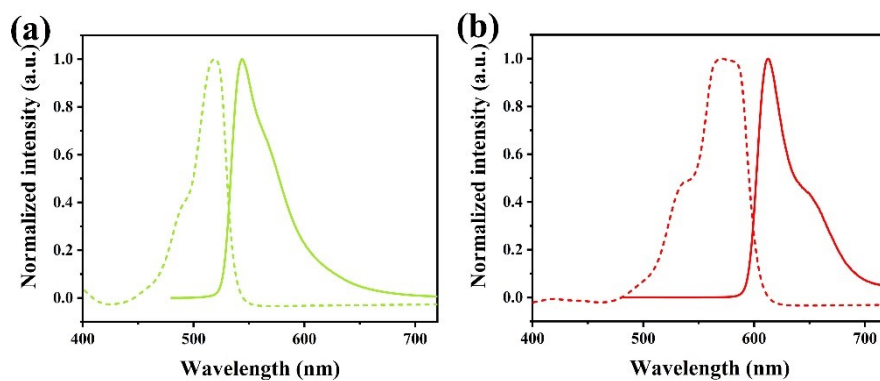

**Figure S2.** The UV-vis absorption spectra (dashed line) and emission spectra (solid line) of (a) ZIF-8@pm567A and (b) ZIF-8@SRh101, respectively.

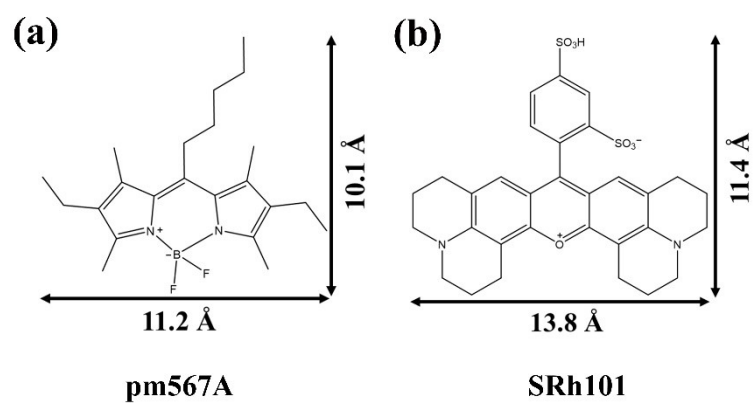

**Figure S3.** Chemical structures of (a) pm567A and (b) SRh101 with the corresponding molecular dimensions

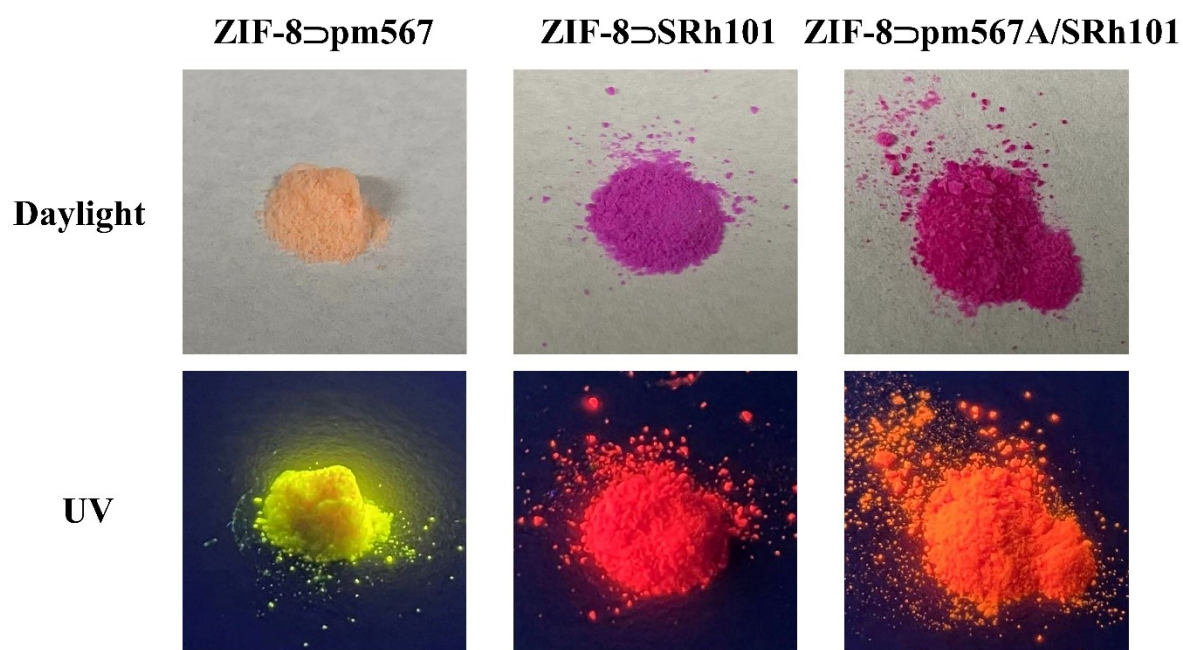

**Figure S4.** Photographs of ZIF-8 $\supset$ pm567A, ZIF-8 $\supset$ SRh101 and ZIF-8 $\supset$ pm567A/SRh101 under daylight and UV.

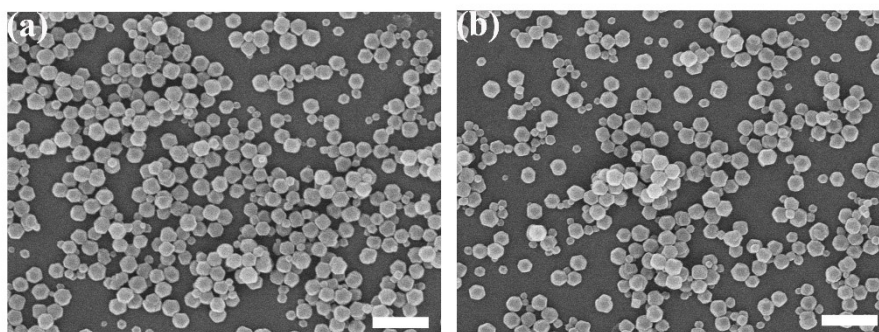

**Figure S5.** The SEM images of (a) ZIF-8 and (b) ZIF-8@pm567A/SRh101. Scale bar, 500 nm.

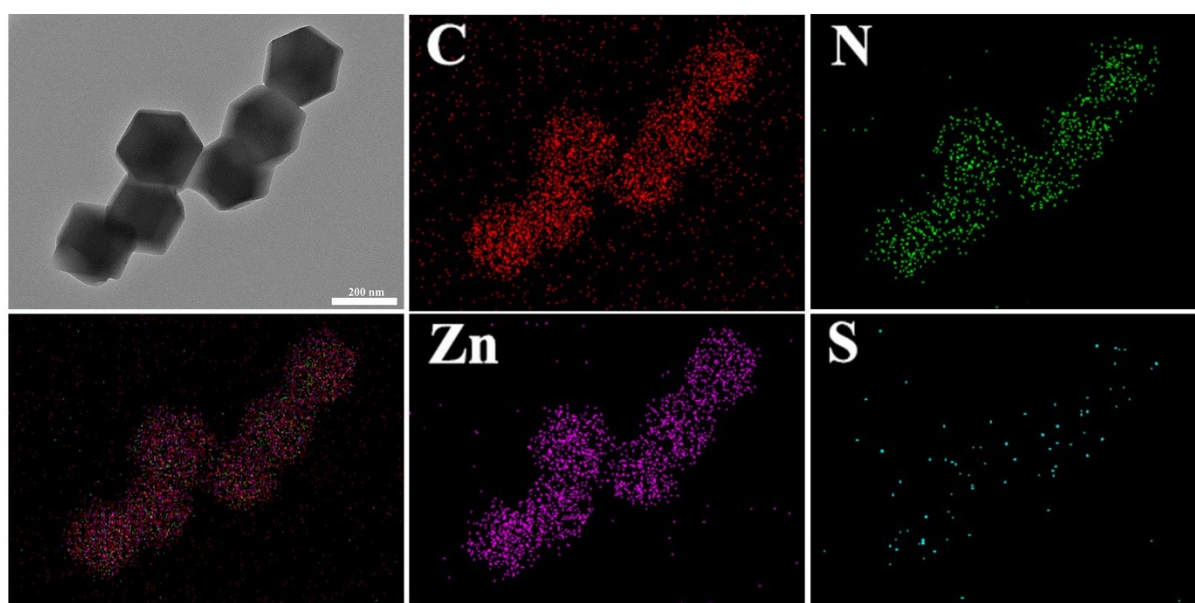

**Figure S6.** The TEM image of ZIF-8@pm567A/SRh101 and the corresponding elemental mapping diagrams of C, N, Zn and S.

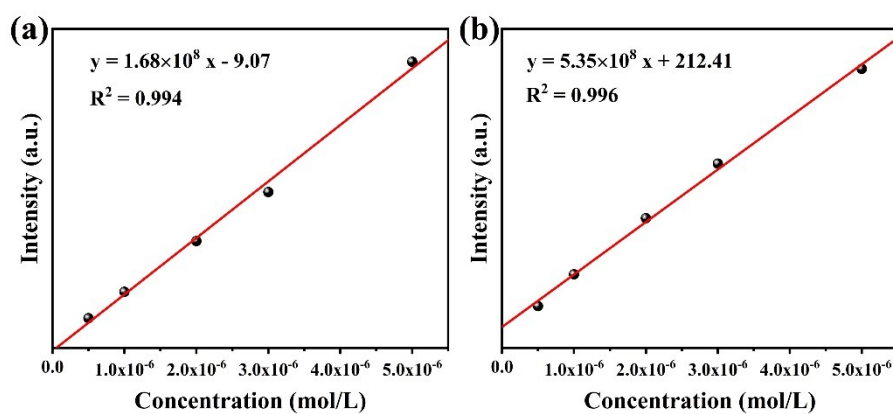

**Figure S7.** The intensity-concentration relationship of (a) pm567A and (b) SRh101 in dilute solution.

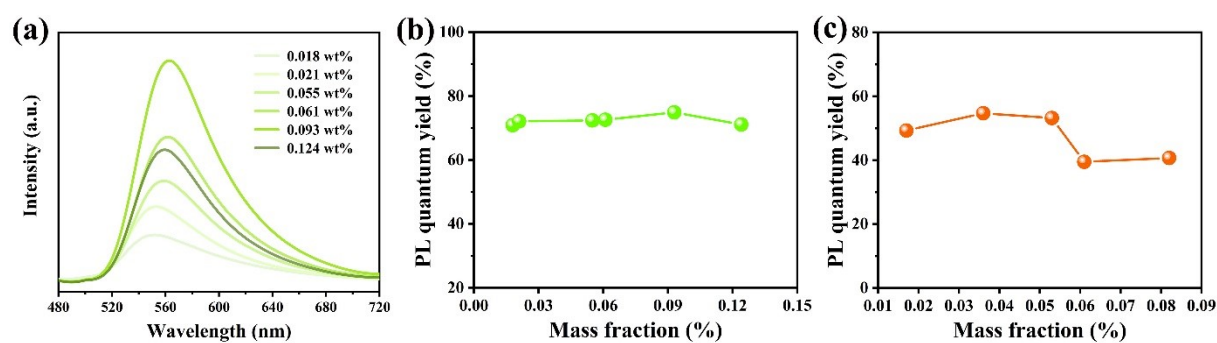

**Figure S8.** (a) The emission spectra and (b) corresponding PLQYs of ZIF-8@pm567A with different loading amounts of pm567A; (c) The PLQYs of ZIF-8@pm567A/SRh101 with fixed loading amounts of pm567A and different loading amounts of SRh101.

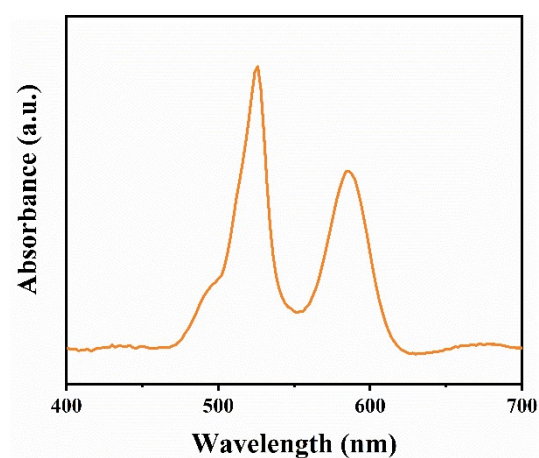

**Figure S9.** The UV-vis spectrum of ZIF-8@pm567A/SRh101 with 0.093 wt% pm567A and 0.053 wt% SRh101.



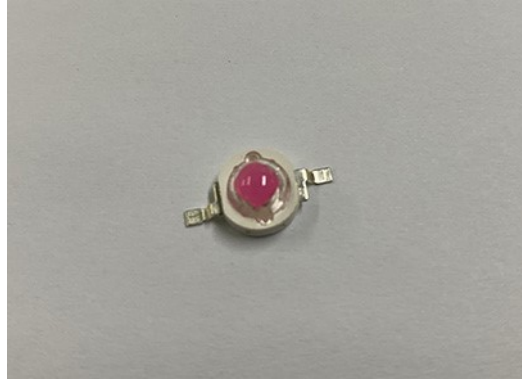

**Figure S10.** A photograph of an LED fabricated by ZIF-8@pm567A/SRh101 with a 460 nm blue LED chip.

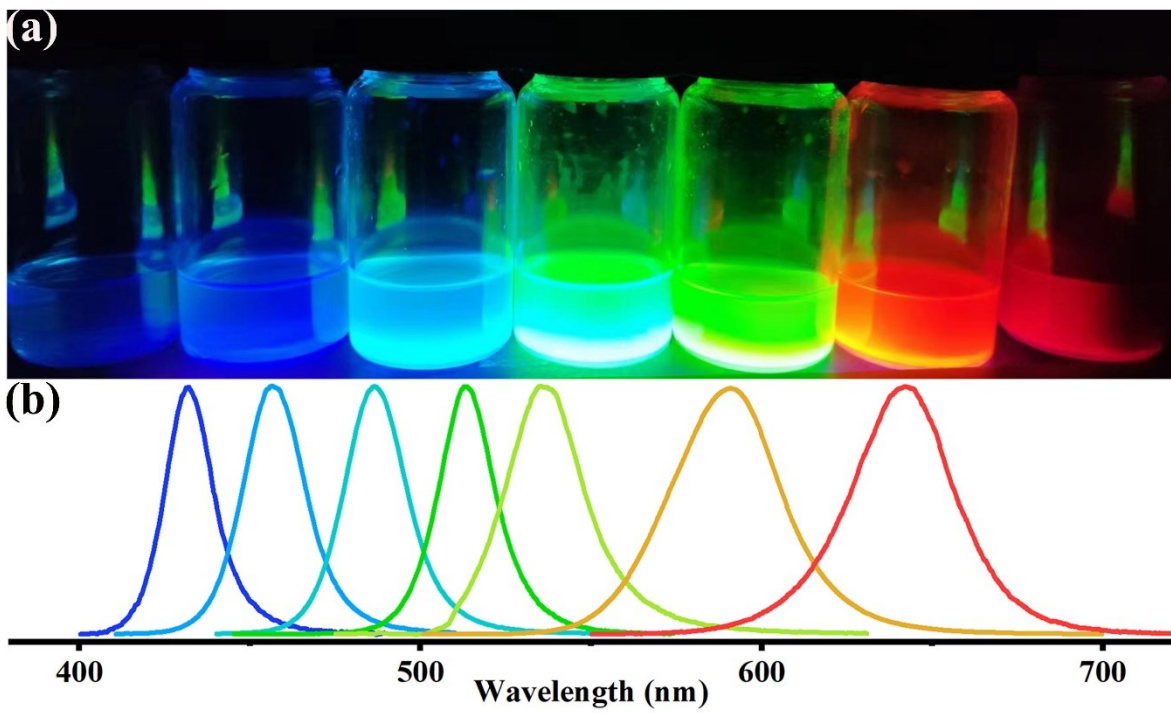

**Figure S11.** (a) The photograph and (b) corresponding emission spectra of CsPbX<sub>3</sub> NCs.

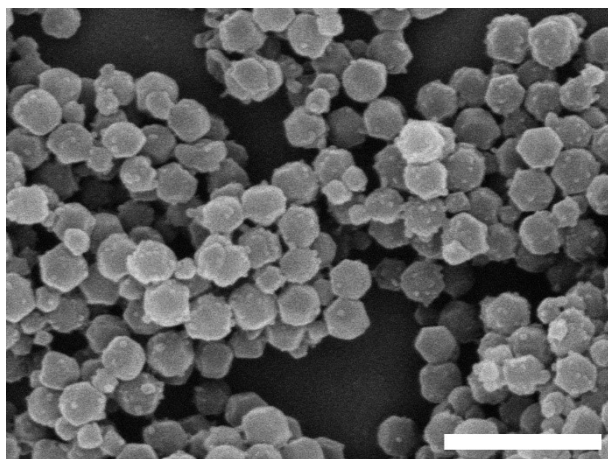

**Figure S12.** The SEM image of ZIF-8@pm567A/SRh101@CsPbClBr<sub>2</sub>.

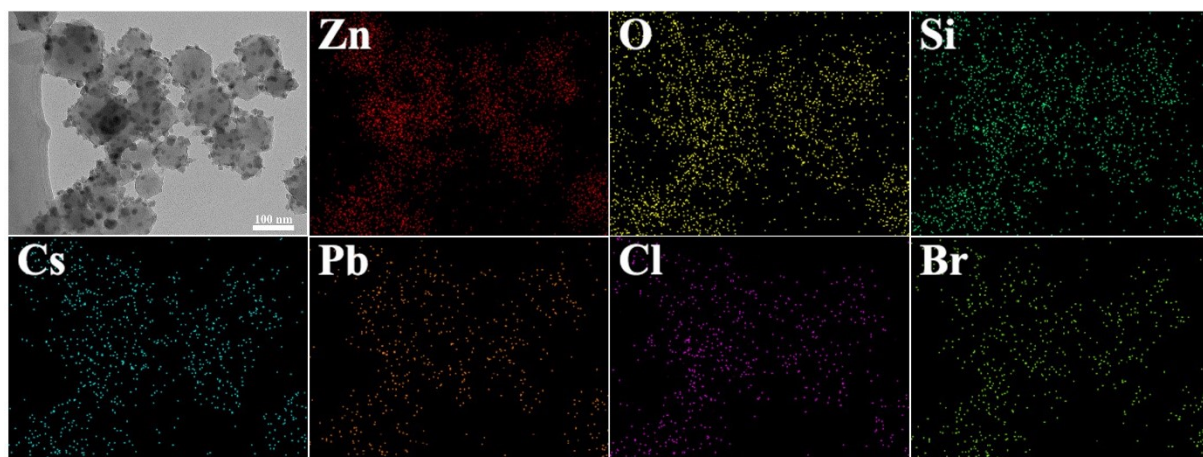

**Figure S13.** The TEM image of ZIF-8@pm567A/SRh101@CsPbClBr<sub>2</sub>-SiO<sub>2</sub> and the corresponding elemental mapping diagrams of Zn, O, Si, Cs, Pb, Cl and Br.

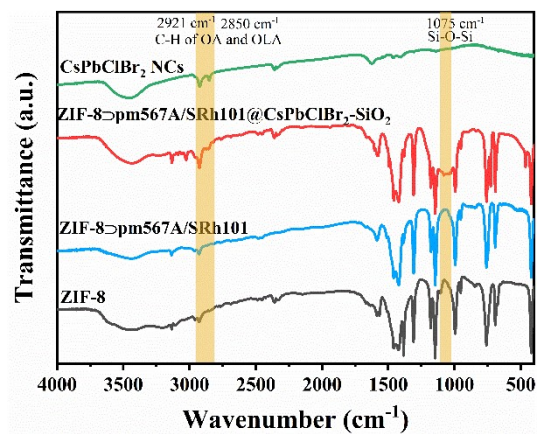

**Figure S14.** FTIR spectra of ZIF-8, ZIF-8 $\supset$ pm567/SRh101, CsPbClBr<sub>2</sub> NCs and ZIF-8 $\supset$ pm567A/SRh101@CsPbClBr<sub>2</sub>-SiO<sub>2</sub>.

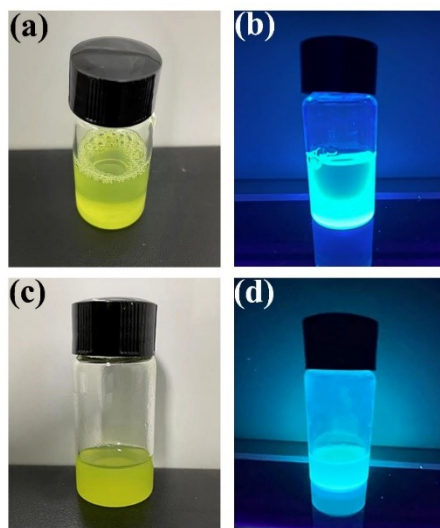

**Figure S15.** Photographs of (a, b) CsPbClBr<sub>2</sub> NCs and (c, d) ZIF-8 @CsPbClBr<sub>2</sub>-SiO<sub>2</sub> under daylight and UV.

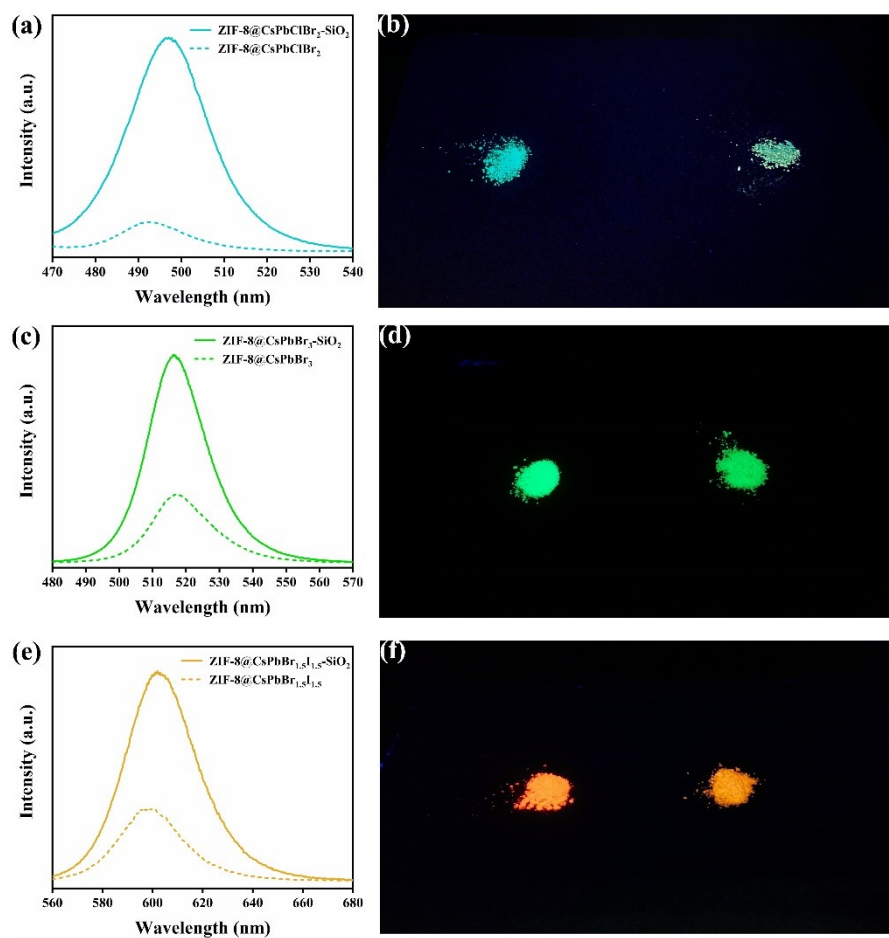

**Figure S16.** The emission spectra and photographs of (a, b) ZIF-8@CsPbClBr<sub>2</sub>-SiO<sub>2</sub>, (c, d) ZIF-8@CsPbBr<sub>3</sub>-SiO<sub>2</sub> and (e, f) ZIF-8@CsPbClBr<sub>1.5</sub>I<sub>1.5</sub>-SiO<sub>2</sub>.

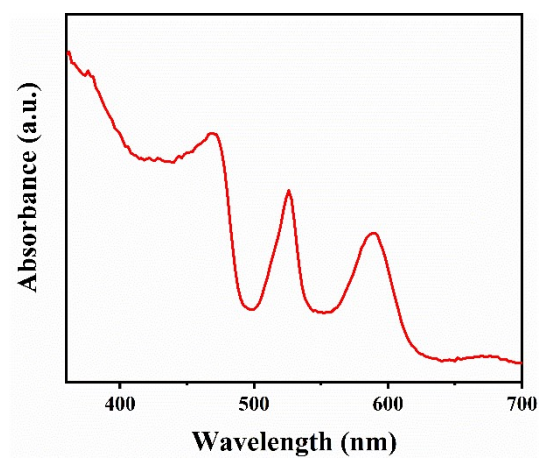

**Figure S17.** The UV-vis spectrum of ZIF-8@pm567A/SRh101@CsPbClBr<sub>2</sub>-SiO<sub>2</sub>.

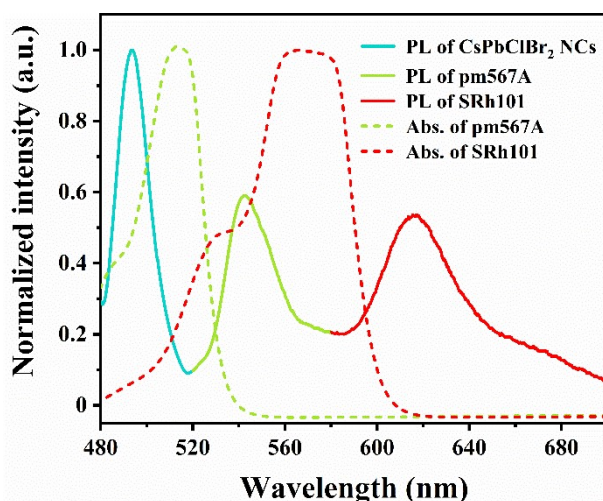

**Figure S18.** The UV-vis absorption spectra (dashed line) and emission spectra (solid line) of pm567A, SRh101 and CsPbClBr<sub>2</sub> NCs, respectively.

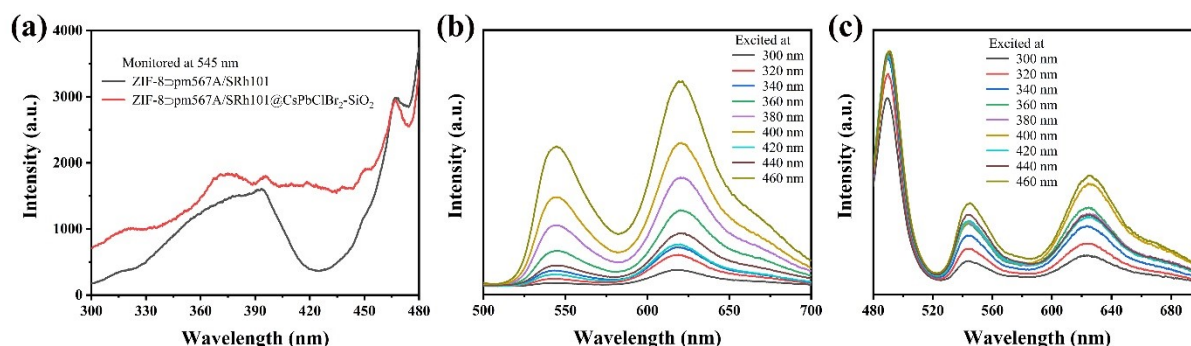

**Figure S19.** (a) The excitation spectra of ZIF-8@pm567A/SRh101@CsPbClBr<sub>2</sub>-SiO<sub>2</sub> and ZIF-8@pm567A/SRh101 with the monitor wavelength of 545 nm. (b) The excitation-wavelength-dependent emission spectrum of ZIF-8@pm567A/SRh101. (c) The excitation-wavelength-dependent emission spectrum of ZIF-8@pm567A/SRh101@CsPbClBr<sub>2</sub>-SiO<sub>2</sub>.

According to the recent relevant review, a reliable proof of the energy transfer can be obtained by measuring the excitation spectrum, selecting the emission (observation) wavelength in a region where the emission of the acceptor can be detected, but where there is no emission signal from the donor.<sup>3</sup> We have measured the excitation spectra of ZIF-8@pm567A/SRh101 and ZIF-8@pm567A/SRh101@CsPbClBr<sub>2</sub>-SiO<sub>2</sub> by selecting 545 nm as

the monitor wavelength. When using the emission of pm567A (545 nm) as the monitor wavelength, ZIF-8@pm567A/SRh101 cannot be effectively excited within the wavelength range of 400-450 nm while ZIF-8@pm567A/SRh101@CsPbClBr<sub>2</sub>-SiO<sub>2</sub> can be effectively excited within this wavelength range. Therefore, we attributed this to the strong absorption of CsPbClBr<sub>2</sub> NCs in this wavelength range and the energy transfer from CsPbClBr<sub>2</sub> NCs to pm567A.

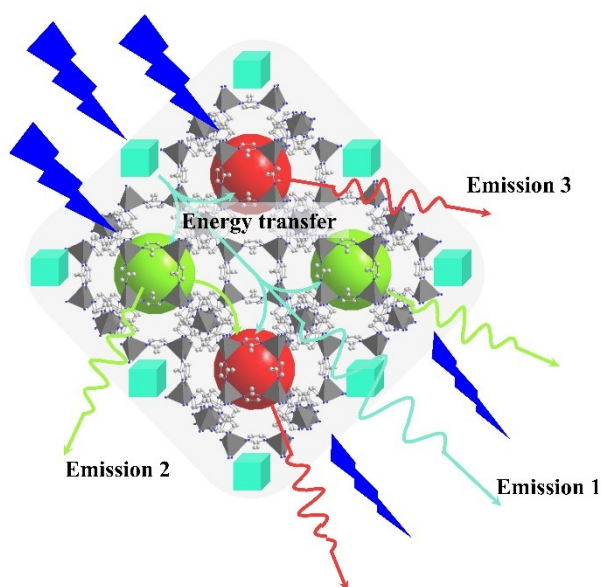

**Figure S20.** Illustration of the energy transfer in ZIF-8@pm567A/SRh101@CsPbClBr<sub>2</sub>-SiO<sub>2</sub>.

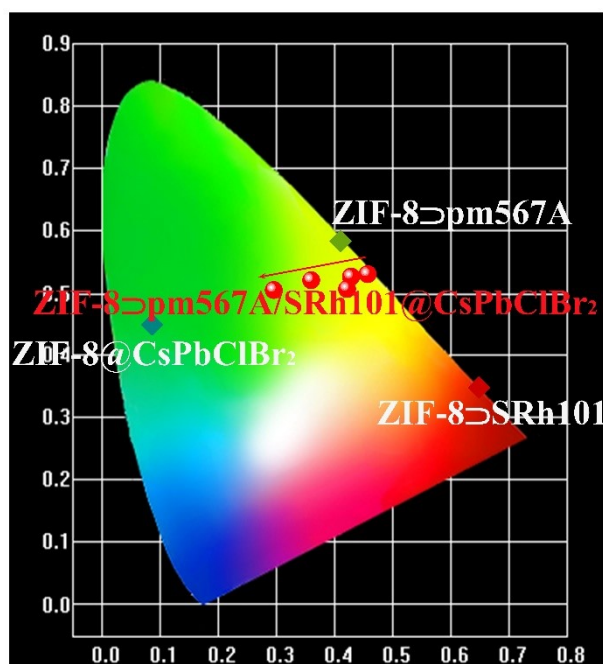

**Figure S21.** The CIE chromaticity coordinates of ZIF-8@pm567A/SRh101@CsPbClBr<sub>2</sub>-SiO<sub>2</sub> with fixed loading amounts of pm567A and SRh101 and different loading amounts of CsPbClBr<sub>2</sub> NCs.

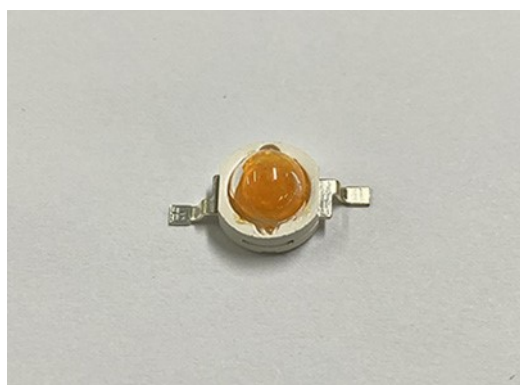

**Figure S22.** A photograph of an LED fabricated by ZIF-8@pm567A/SRh101@CsPbClBr<sub>2</sub>-SiO<sub>2</sub> with a 460 nm blue LED chip.

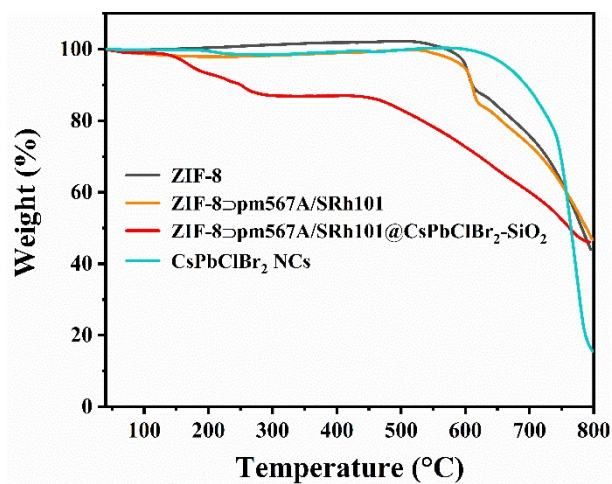

**Figure S23.** The thermogravimetric curves of ZIF-8, ZIF-8@pm567A/SRh101, ZIF-8@pm567A/SRh101@CsPbClBr<sub>2</sub>-SiO<sub>2</sub> and CsPbClBr<sub>2</sub> NCs.

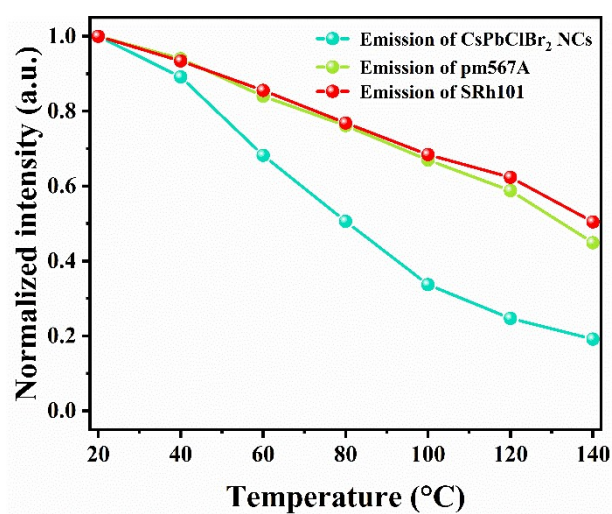

**Figure S24.** The thermostability of ZIF-8@pm567A/SRh101@CsPbClBr<sub>2</sub>-SiO<sub>2</sub>.



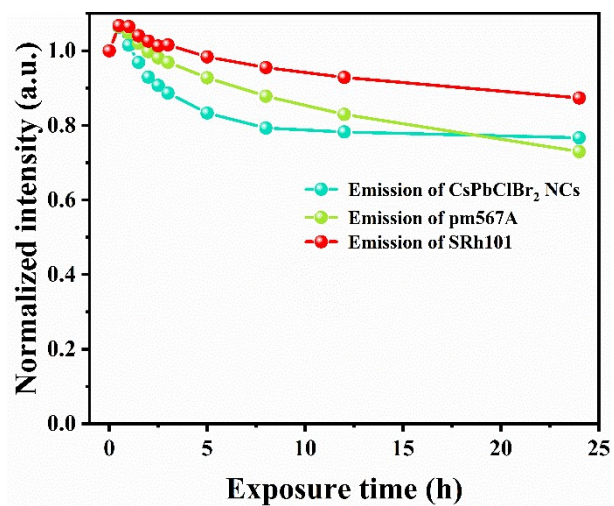

**Figure S25.** The photostability of ZIF-8@pm567A/SRh101@CsPbClBr<sub>2</sub>-SiO<sub>2</sub>.

**Table S1.** PLQYs of ZIF-8@pm567A with different loading amounts of pm567A.

| Sample                          | PLQY (%) |
|---------------------------------|----------|
| ZIF-8@pm567A (0.018 wt% pm567A) | 70.9     |
| ZIF-8@pm567A (0.021 wt% pm567A) | 72.1     |
| ZIF-8@pm567A (0.055 wt% pm567A) | 72.4     |
| ZIF-8@pm567A (0.061 wt% pm567A) | 72.6     |
| ZIF-8@pm567A (0.093 wt% pm567A) | 74.9     |
| ZIF-8@pm567A (0.124 wt% pm567A) | 71.1     |

**Table S2.** The PLQYs of ZIF-8@pm567A/SRh101 with fixed loading amounts of pm567A and different loading amounts of SRh101.

| Sample                                 | PLQY (%) |
|----------------------------------------|----------|
| ZIF-8@pm567A/SRh101 (0.017 wt% SRh101) | 49.3     |
| ZIF-8@pm567A/SRh101 (0.036 wt% SRh101) | 54.7     |
| ZIF-8@pm567A/SRh101 (0.053 wt% SRh101) | 53.2     |
| ZIF-8@pm567A/SRh101 (0.061 wt% SRh101) | 39.5     |
| ZIF-8@pm567A/SRh101 (0.082 wt% SRh101) | 40.7     |

**Table S3.** The PLQYs of ZIF-8@pm567A/SRh101@CsPbClBr<sub>2</sub>-SiO<sub>2</sub> with different loading amounts of CsPbClBr<sub>2</sub> NCs.

| Sample                                                                                         | PLQY (%) |
|------------------------------------------------------------------------------------------------|----------|
| ZIF-8@pm567A/SRh101@CsPbClBr <sub>2</sub> -SiO <sub>2</sub> (0.013 wt% CsPbClBr <sub>2</sub> ) | 44.2     |
| ZIF-8@pm567A/SRh101@CsPbClBr <sub>2</sub> -SiO <sub>2</sub> (0.037 wt% CsPbClBr <sub>2</sub> ) | 45.7     |
| ZIF-8@pm567A/SRh101@CsPbClBr <sub>2</sub> -SiO <sub>2</sub> (0.085 wt% CsPbClBr <sub>2</sub> ) | 45.8     |
| ZIF-8@pm567A/SRh101@CsPbClBr <sub>2</sub> -SiO <sub>2</sub> (0.140 wt% CsPbClBr <sub>2</sub> ) | 44.8     |
| ZIF-8@pm567A/SRh101@CsPbClBr <sub>2</sub> -SiO <sub>2</sub> (0.179 wt% CsPbClBr <sub>2</sub> ) | 43.6     |
| ZIF-8@pm567A/SRh101@CsPbClBr <sub>2</sub> -SiO <sub>2</sub> (0.217 wt% CsPbClBr <sub>2</sub> ) | 42.1     |

### 3. References

1. H. Zheng, Y. Zhang, L. Liu, W. Wan, P. Guo, A. M. Nyström and X. Zou, *J. Am. Chem. Soc.*, 2016, **138**, 962-968.
2. X. Li, Y. Wu, S. Zhang, B. Cai, Y. Gu, J. Song and H. Zeng, *Adv. Funct. Mater.*, 2016, **26**, 2435-2445.
3. M. Gutiérrez, Y. Zhang and J.-C. Tan, *Chem. Rev.*, 2022, **122**, 10438-10483.
